# Supplementary material
Source: PubMed Central journal article supplement (PMC3957835)
Supplement: AAC.02155-13_zac003142649so1.pdf [file AAC.02155-13_zac003142649so1.pdf]

**Supplementary table 1. Antifungal susceptibility (in mg/L) of rare species according EUCAST protocol (incidence <1%)**

| Species (N)                                | Value                | MIC (mg/L)  |             |             |              |               |               |            |             |             |
|--------------------------------------------|----------------------|-------------|-------------|-------------|--------------|---------------|---------------|------------|-------------|-------------|
|                                            |                      | AmB         | Flucytosine | FLC         | ITZ          | VOR           | POS           | CAS        | MIC         | AND         |
| <i>C. orthopsilosis</i><br>(n=7)           | GM                   | 0.06        | 0.12        | 0.5         | 0.02         | 0.018         | 0.015         | 0.906      | 0.305       | 0.37        |
|                                            | Mode                 | 0.06        | 0.12        | 0.5         | 0.015        | 0.015         | 0.015         | 1          | 0.25        | 0.25        |
|                                            | Range                | 0.03-0.12   | 0.12 – 0.12 | 0.5 – 0.5   | 0.015 – 0.03 | 0.015 – 0.015 | 0.015 – 0.015 | 0.5 – 1    | 0.25 – 0.5  | 0.25 – 0.5  |
| <i>C. neoformans</i> <sup>a</sup><br>(n=5) | GM                   | 0.144       | 11.3        | 16          | 0.043        | 0.1           | 0.51          | 16         | 16          | 16          |
|                                            | Mode                 | 0.12        | 4           | 8           | 0.015        | 0.015         | 0.03          | 32         | 32          | 32          |
|                                            | Range                | 0.12 -0.25  | 4 – 32      | 8 – >64     | 0.015 – 0.5  | 0.015 – 4     | 0.015 – 0.5   | 16 – >16   | >16 – >16   | >16 – >16   |
| <i>C. kefyr</i><br>(n=4)                   | GM                   | 0.35        | 0.17        | 0.21        | 0.019        | 0.015         | 0.021         | 0.247      | 0.03        | 0.03        |
|                                            | Mode                 | 0.25        | 0.12        | 0.12        | 0.015        | 0.015         | 0.015         | 0.25       | 0.03        | 0.03        |
|                                            | Range                | 0.12 -2     | 0.12 – 0.5  | 0.12 – 0.5  | 0.015 – 0.03 | 0.015 – 0.015 | 0.015 – 0.03  | 0.12 – 0.5 | 0.03 – 0.03 | 0.03 – 0.03 |
| <i>C. dubliniensis</i><br>(N=4)            | GM                   | 0.036       | 0.12        | 0.17        | 0.021        | 0.015         | 0.015         | 0.35       | 0.03        | 0.03        |
|                                            | Mode                 | 0.03        | 0.12        | 0.12        | 0.015        | 0.015         | 0.015         | 0.25       | 0.03        | 0.03        |
|                                            | Range                | 0.03 - 0.06 | 0.12 – 0.12 | 0.12 – 0.25 | 0.12 – 0.25  | 0.015 – 0.015 | 0.015 – 0.015 | 0.25 – 0.5 | 0.03 - 0.03 | 0.03 – 0.03 |
| <i>C. lypolytica</i> <sup>a</sup><br>(n=3) | GM                   | 0.32        | 64          | 12.7        | 0.4          | 0.06          | 1             | 6.3        | 3.2         | 2           |
|                                            | Range                | 0.25 - 0.5  | 32 - >64    | 2 - >64     | 0.12 – 2     | 0.015 – 0.25  | 0.25 - >8     | 2 - >16    | 0.5 - >16   | 0.5 - >16   |
| <i>D. capitatus</i> <sup>a</sup><br>(n=3)  | GM                   | 0.31        | 0.15        | 50.8        | 0.63         | 3.17          | 0.8           | 16         | 8           | 6.35        |
|                                            | Range                | 0.12 - 0.5  | 0.12 - 0.25 | 32 - >64    | 0.25 - 2     | 1 - >8        | 0.5 - 2       | 16 - >16   | 0.5 - >16   | 2 - >16     |
| <i>T. asahii</i> <sup>a</sup><br>(n=3)     | GM                   | 2           | 11.3        | 2           | 0.17         | 0.25          | 0.25          | 16         | 16          | 11.3        |
|                                            | Rango                | 2 - 2       | 8 - 16      | 1 - 4       | 0.12 - 0.25  | 0.25 - 0.25   | 0.25 - 0.25   | 16 - >16   | >16 ->16    | 4 - >16     |
| <i>C. metapsilosis</i><br>N=2              | MIC (1)              | 0.06        | 0.12        | 1           | 0.015        | 0.03          | 0.015         | 1          | 0.25        | 0.12        |
|                                            | MIC (2)              | 0.03        | 0.12        | 1           | 0.03         | 0.03          | 0.015         | 0.5        | 0.25        | 0.12        |
| <i>P. anomala</i><br>N=2                   | MIC (1)              | 0.03        | 0.12        | 2           | 0.06         | 0.06          | 0.06          | 0.25       | 0.03        | 0.03        |
|                                            | MIC (2) <sup>a</sup> | 0.12        | 0.12        | 4           | 0.12         | 0.12          | 0.06          | 0.25       | 0.03        | 0.03        |
| <i>R. mucilaginosa</i> <sup>a</sup>        | MIC (1)              | 0.25        | 1           | >64         | 1            | >8            | 2             | 16         | >16         | >16         |
|                                            | MIC (2)              | 0.25        | 0.25        | >64         | 4            | 8             | 4             | 16         | >16         | >16         |
| <i>C. intermedia</i> *                     | MIC                  | 0.03        | 64          | 0.25        | 0.015        | 0.015         | 0.015         | 0.25       | 0.06        | 0.03        |
| <i>K. ohmeri</i> *                         | MIC                  | 0.03        | 0.12        | 8           | 0.06         | 0.06          | 0.015         | >16        | 0.12        | 1           |
| <i>L. elongisporus</i> *                   | MIC                  | 0.03        | 0.5         | 0.25        | 0.06         | 0.015         | 0.03          | 0.25       | 0.03        | 0.03        |
| <i>C. nivariensis</i> *                    | MIC                  | 0.25        | 1           | 2           | 2            | 4             | 0.06          | 0.25       | 0.03        | 0.03        |
| <i>P. fabianii</i> *                       | MIC                  | 0.06        | 0.12        | 1           | 0.03         | 0.015         | 0.06          | 0.25       | 0.03        | 0.03        |

|                         |     |      |      |      |       |       |       |     |      |      |
|-------------------------|-----|------|------|------|-------|-------|-------|-----|------|------|
| <i>M. pulcherrima</i> * | MIC | 0.03 | 0.12 | 0.25 | 0.015 | 0.015 | 0.015 | 0.5 | 0.06 | 0.03 |
|-------------------------|-----|------|------|------|-------|-------|-------|-----|------|------|

640

641 MIC values were obtained after 24 h of incubation according to the EUCAST protocol, except in those isolates that presented low  
642 growth or non-fermentative yeast. In these last cases (<sup>a</sup>), MIC values were obtained using the EUCAST recommendations for non-  
643 fermentative yeasts (30°C incubation, shaking and 48 h growth). In the cases where n=2, both MIC values are shown. \* n=1.

644

**Supplementary table 2. Antifungal susceptibility (in mg/L) of rare species according CLSI protocol (incidence <1%)**

| Species (N)                                | Value                | MIC (mg/L)       |            |                    |                   |             |               |              |
|--------------------------------------------|----------------------|------------------|------------|--------------------|-------------------|-------------|---------------|--------------|
|                                            |                      | AmB              | FLC        | VOR                | POS               | CAS         | MIC           | AND          |
| <i>C. orthopsilosis</i><br>(n=7)           | GM                   | 0.12             | 0.41       | 0.01               | 0.016             | 0.27        | 0.33          | 0.74         |
|                                            | Mode                 | 0.12             | 1          | 0.003 <sup>c</sup> | 0.015             | 0.25        | 0.25          | 1            |
|                                            | Range                | 0.12 - 0.12      | 0.062 - 1  | 0.003 - 0.3        | 0.003 - 0.06      | 0.12 - 0.5  | 0.12 - 1      | 0.5 - 1      |
| <i>C. neoformans</i> <sup>a</sup><br>(n=5) | GM                   | 0.17             | 1.68       | 0.018              | 0.009             | >2          | >2            | >2           |
|                                            | Mode                 | 0.06             | 1          | 0.03               | 0.003             | >2          | >2            | >2           |
|                                            | Range                | 0.06 - 0.5       | 1 - 4      | 0.007 - 0.03       | 0.003 - 0.06      | >2 - >2     | >2 - >2       | >2 - >2      |
| <i>C. kefyri</i><br>(n=4)                  | GM                   | 0.71             | 0.5        | 0.008              | 0.04              | 0.09        | 0.05          | 0.05         |
|                                            | Mode                 | 0.5              | 0.5        | 0.007              | 0.03 <sup>c</sup> | 0.12        | 0.06          | 0.03         |
|                                            | Range                | 0.25 - >2        | 0.25 - 1   | 0.007 - 0.015      | 0.03 - 0.06       | 0.03 - 0.12 | 0.03 - 0.06   | 0.03 - 0.12  |
| <i>C. dubliniensis</i><br>(n=4)            | GM                   | 0.06             | 0.42       | 0.004              | 0.06              | 0.15        | 0.009         | 0.018        |
|                                            | Mode                 | 0.06             | 0.5        | 0.007              | 0.015             | 0.12        | NA            | 0.03         |
|                                            | Range                | 0.015 - 0.25     | 0.12 - 1   | 0.0017 - 0.007     | 0.0017 - 0.015    | 0.12 - 0.25 | 0.0017 - 0.03 | 0.007 - 0.03 |
| <i>C. lyolytica</i> <sup>b</sup><br>(n=3)  | GM                   | 0.25             | 2.5        | 0.09               | 0.12              | 0.06        | 0.5           | 0.027        |
|                                            | Range                | 0.12 - 0.5       | 0.25 - >64 | 0.015 - >2         | 0.015 - >2        | 0.007 - 0.5 | 0.5 - 0.5     | 0.003 - 0.25 |
| <i>D. capitatus</i><br>(n=3)               | GM                   | 0.5              | 64         | 1.26               | 0.4               | >2          | 2             | >2           |
|                                            | Range                | 0.25 - 1         | 32 - >64   | 0.5 - >2           | 0.25 - 0.5        | >2 - >2     | 2 - 2         | 2 - >2       |
| <i>T. asahii</i><br>(n=3)                  | GM                   | 1                | 0.5        | 0.015              | 0.06              | >2          | 2             | >2           |
|                                            | Rango                | 1 - 1            | 0.5 - 0.5  | 0.015 - 0.015      | 0.06 - 0.06       | >2 - >2     | 2 - 2         | >2 - >2      |
| <i>C. metapsilosis</i><br>(n=2)            | MIC (1)              | 0.12             | 0.12       | 0.003              | 0.003             | 0.25        | 0.25          | 0.5          |
|                                            | MIC (2)              | 0.12             | 1          | 0.015              | 0.03              | 0.03        | 0.03          | 0.12         |
| <i>P. anomala</i><br>(n=2)                 | MIC (1)              | 0.5 <sup>b</sup> | 0.12       | 0.015              | 0.06              | 0.12        | 0.03          | 0.007        |
|                                            | MIC (2)              | 0.12             | 1          | 0.007              | 0.015             | 0.12        | 0.003         | 0.0017       |
| <i>R. mucilaginosa</i>                     | MIC (1) <sup>b</sup> | 0.25             | 32         | 0.5                | 0.06              | >2          | >2            | >2           |
|                                            | MIC (2) <sup>a</sup> | 0.5              | >64        | 1                  | 1                 | >2          | >2            | >2           |
| <i>C. intermedia</i> <sup>*</sup>          | MIC                  | 0.06             | 1          | 0.003              | 0.003             | 0.12        | 0.06          | 0.03         |
| <i>K. ohmeri</i> <sup>*</sup>              | MIC                  | 0.06             | 1          | 0.03               | 0.06              | 0.5         | 0.06          | 0.007        |
| <i>L. elongisporus</i> <sup>*</sup>        | MIC                  | 0.03             | 0.12       | 0.0017             | 0.007             | 0.06        | 0.015         | 0.015        |
| <i>C. nivariensis</i> <sup>*</sup>         | MIC                  | 0.5              | 4          | 0.03               | 0.12              | 0.25        | 0.015         | 0.03         |
| <i>P. fabianii</i> <sup>*</sup>            | MIC                  | 0.12             | 2          | 0.03               | 0.06              | 0.12        | 0.007         | 0.007        |

|                                      |     |     |      |        |        |       |       |       |
|--------------------------------------|-----|-----|------|--------|--------|-------|-------|-------|
| <i>M. pulcherrima</i> * <sup>b</sup> | MIC | 0.5 | 0.12 | 0.0017 | 0.0017 | 0.015 | 0.007 | 0.007 |
|--------------------------------------|-----|-----|------|--------|--------|-------|-------|-------|

646

647 Susceptibility data was obtained after 24 hours of incubation. In some cases, since the isolates did not show enough growth at 24

648 hours, the MICs were obtained after 48 <sup>(b)</sup> or 72 <sup>(a)</sup> hours of incubation. <sup>c</sup> When multiple modes available, the smallest value is

649 shown. **NA**, Mode not available due to the low number of isolates. When n=2, both MICs are shown. \*, n=1
